# Supplementary material for: A Novel Network Science and Similarity-Searching-Based Approach for Discovering Potential Tumor-Homing Peptides from Antimicrobials
Source: MDPI journal article supplement (doi:10.3390/antibiotics11030401), 2022-03-17
Supplement: s1 [file s1]

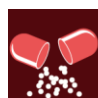**Table S1.** CSN parameters of similarity threshold analysis.

| Similarity threshold | Density | Communities | Modularity | Singletons | ACC   |
|----------------------|---------|-------------|------------|------------|-------|
| 0.1                  | 0.999   | 3           | 0.03       | 0          | 0.999 |
| 0.15                 | 0.996   | 3           | 0.03       | 0          | 0.996 |
| 0.2                  | 0.985   | 3           | 0.03       | 0          | 0.988 |
| 0.25                 | 0.956   | 3           | 0.04       | 0          | 0.968 |
| 0.3                  | 0.891   | 3           | 0.05       | 0          | 0.93  |
| 0.35                 | 0.772   | 3           | 0.07       | 0          | 0.87  |
| 0.4                  | 0.593   | 3           | 0.11       | 0          | 0.791 |
| 0.45                 | 0.383   | 4           | 0.16       | 2          | 0.703 |
| 0.5                  | 0.199   | 4           | 0.23       | 3          | 0.612 |
| 0.55                 | 0.079   | 6           | 0.34       | 20         | 0.508 |
| 0.6                  | 0.023   | 10          | 0.47       | 99         | 0.428 |
| 0.65                 | 0.005   | 34          | 0.68       | 238        | 0.419 |
| 0.7                  | 0.001   | 38          | 0.81       | 449        | 0.544 |
| 0.75                 | 0       | 21          | 0.85       | 548        | 0.535 |
| 0.8                  | 0       | 13          | 0.84       | 587        | 0.456 |
| 0.85                 | 0       | 9           | 0.87       | 606        | 0.456 |
| 0.9                  | 0       | 2           | 0.5        | 623        | -     |
